# Supplementary material
Source: PubMed Central journal article supplement (PMC4142781)
Supplement: Supp_Figure1.pdf [file Supp_Figure1.pdf]

## Supplementary Data

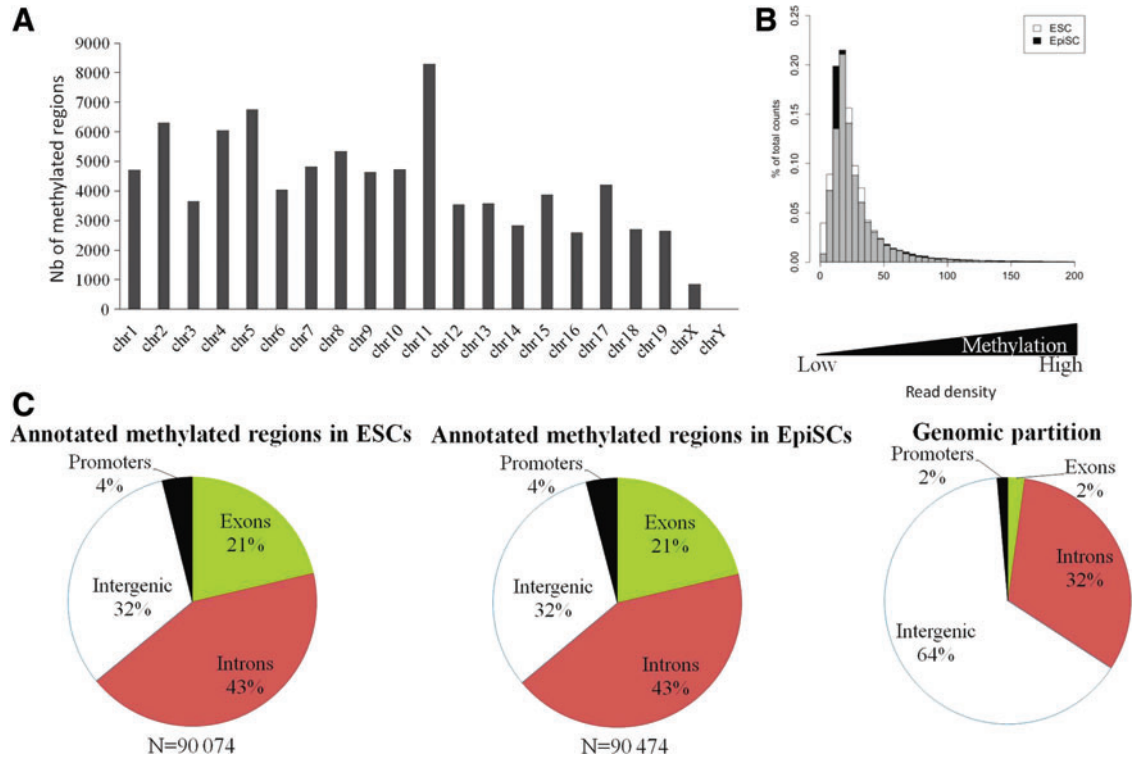

**SUPPLEMENTARY FIG. S1.** Global view of MethylCap-sequencing results. **(A)** Number of methylated regions on each chromosome. The lower number of regions on chromosome X reflects the fact that all cell lines besides EpiSC2 are male. **(B)** Distribution of read density for ESCs and EpiSCs. **(C)** Genomic distribution of methylated regions in ESCs and in EpiSCs (read density >0), compared to the genomic distribution.
