# Supplementary material
Source: PubMed Central journal article supplement (PMC4142781)
Supplement: Supp_Figure2.pdf [file Supp_Figure2.pdf]

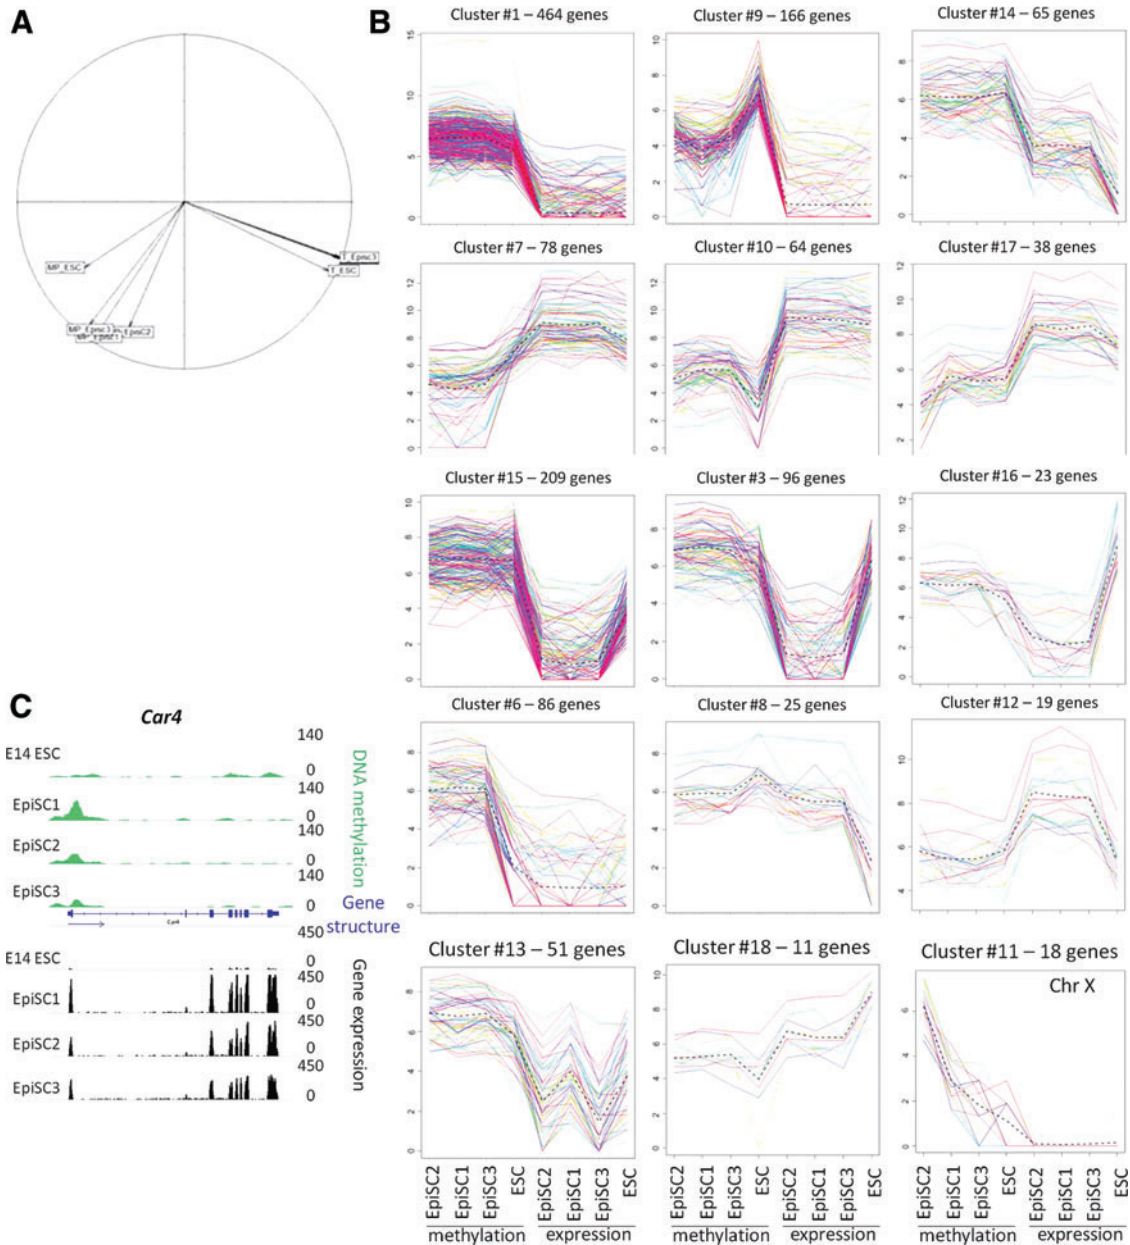

**SUPPLEMENTARY FIG. S2.** DNA methylation and gene expression profiles. **(A)** Correlation circle of the principal component analysis performed on promoter methylation (MP) and gene expression (T) dataset. The major part (85%) of the total variance of the set of variables in the PCA is summarized by the first two axis of the PCA. **(B)** Other clusters obtained on the combined DNA methylation/gene expression datasets (besides the clusters shown in Fig. 2B). **(C)** IGV browser view of a rare example of a gene showing consistent promoter methylation and expression.
