# Supplementary material
Source: PubMed Central journal article supplement (PMC4142781)
Supplement: Supp_Figure4.pdf [file Supp_Figure4.pdf]

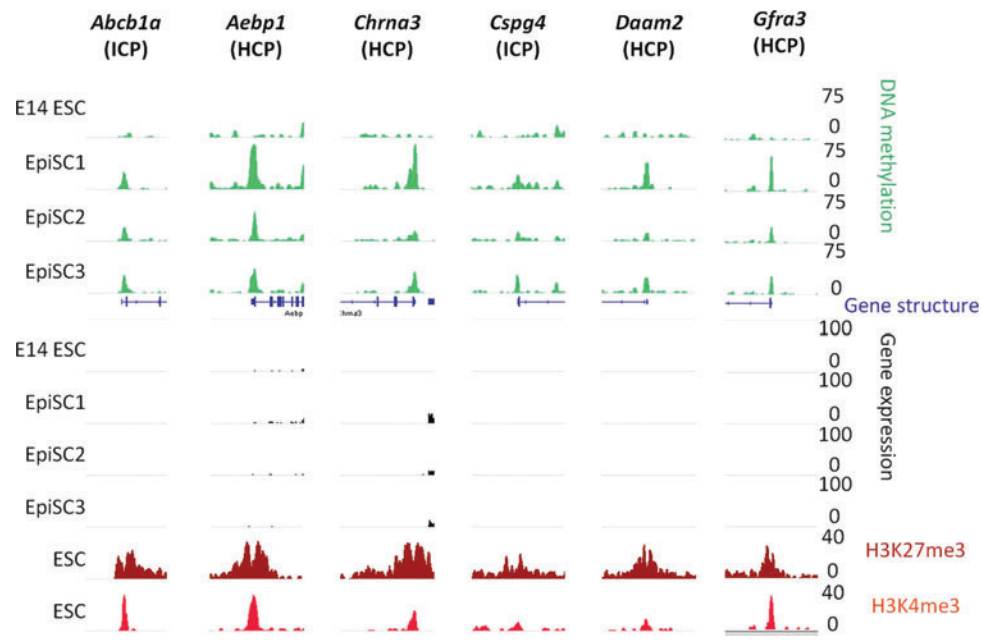

**SUPPLEMENTARY FIG. S4.** Characteristics of six differentially methylated promoters: distribution of DNA methylation, gene expression, and histone marks in ESCs and EpiSCs. Data of the histone marks were from Marks [34].
