# Supplementary material
Source: PubMed Central journal article supplement (PMC4142781)
Supplement: Supp_Figure5.pdf [file Supp_Figure5.pdf]

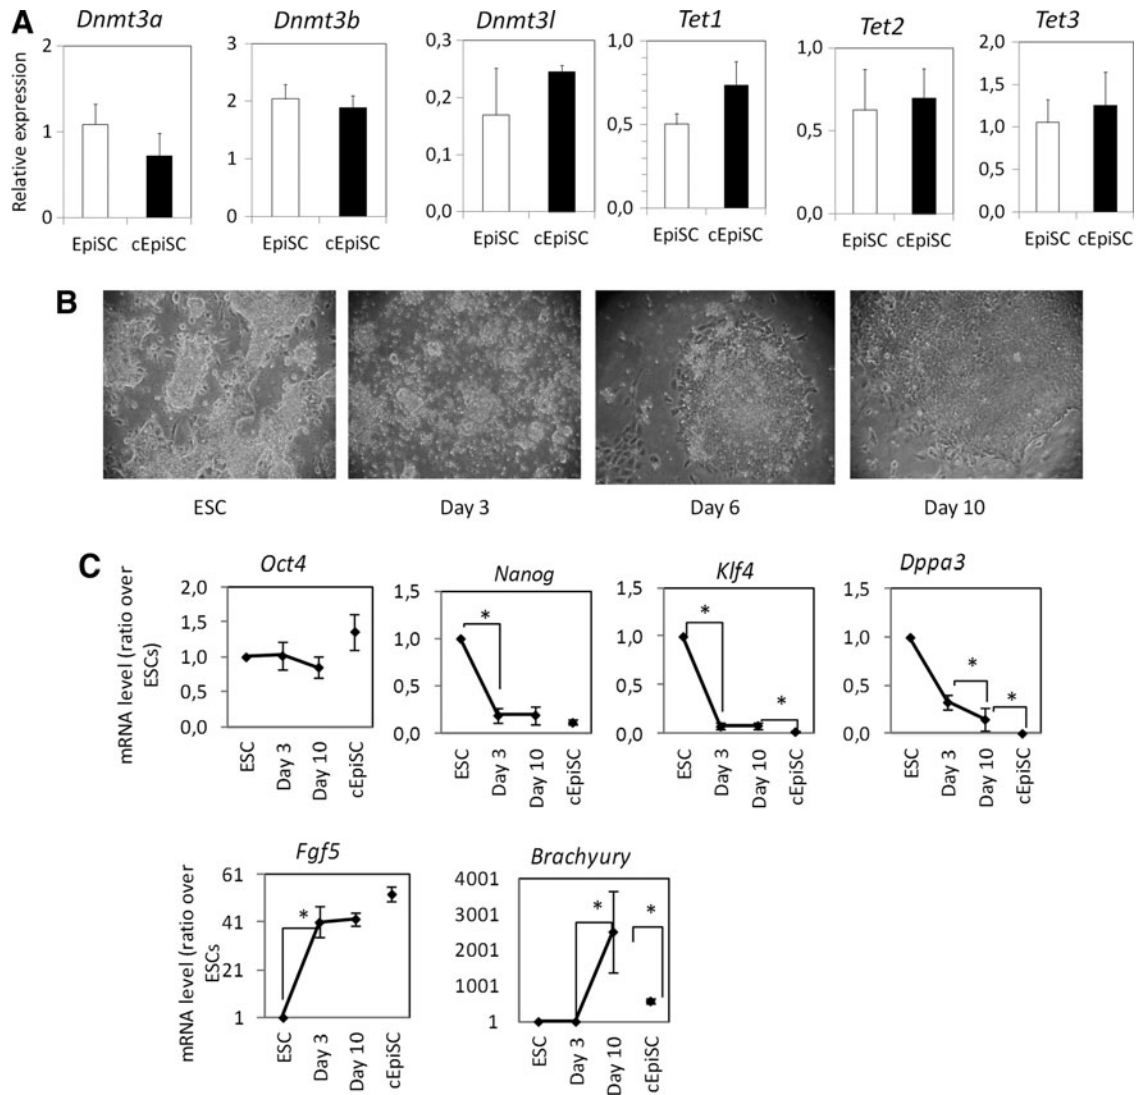

**SUPPLEMENTARY FIG. S5.** (A) Gene expression of DNA methylation modifying enzymes in EpiSCs and cEpiSCs determined by RT-qPCR. Bars represent SEM. (B) Phase contrast pictures of cells during conversion from ESCs to EpiSCs. The first EpiSC-like colonies appear at day 6. (C) Gene expression changes during conversion of ESCs to cEpiSCs determined by RT-qPCR. Bars represent SEM for three experiments. \* $P < 0.05$ , Mann-Whitney  $U$  test.
