# Supplementary material
Source: PubMed Central journal article supplement (PMC4142781)
Supplement: Supp_Figure6.pdf [file Supp_Figure6.pdf]

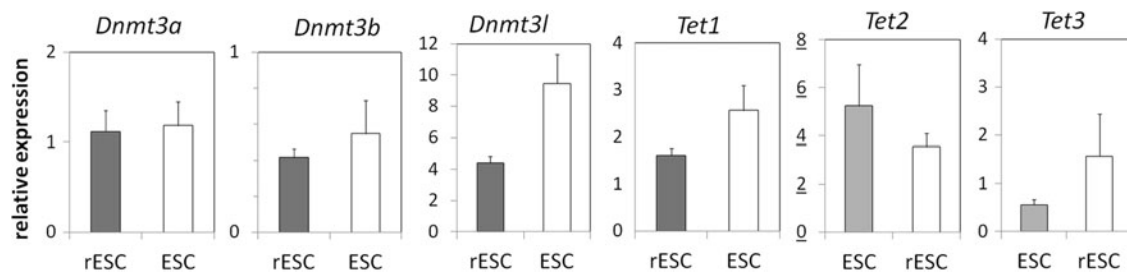

**SUPPLEMENTARY FIG. S6.** Gene expression of DNA methylation modifying enzymes in ESCs and rESCs determined by RT-qPCR. Bars represent SEM.
