# Supplementary material
Source: PubMed Central journal article supplement (PMC4142781)
Supplement: Supp_Figure7.pdf [file Supp_Figure7.pdf]

E7 epiblasts

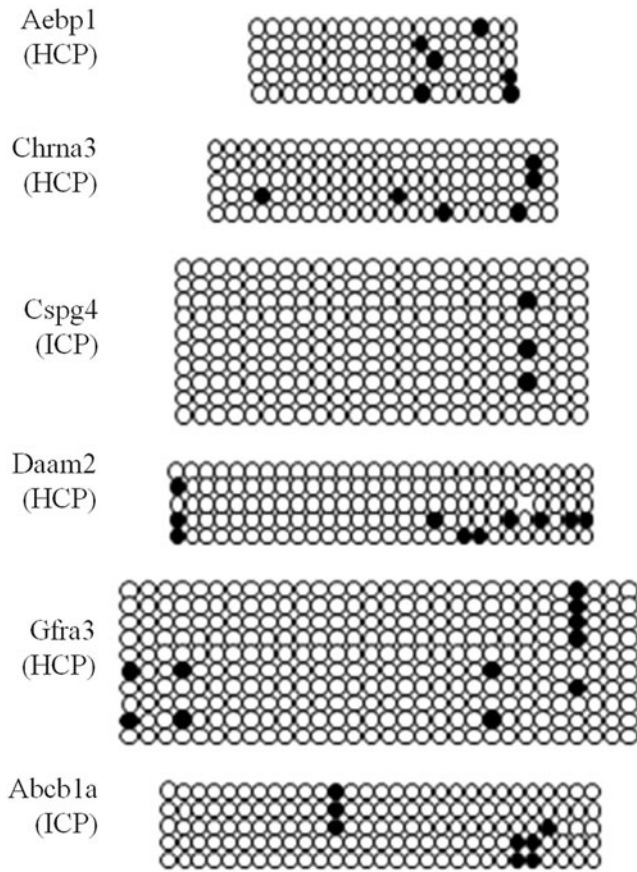

**SUPPLEMENTARY FIG. S7.** Methylation status in the gastrulating epiblast (E7). *Circles* represent CpG nucleotides either methylated (*closed*) or unmethylated (*open*).
