# Supplementary material
Source: PubMed Central journal article supplement (PMC4142781)
Supplement: Supp_Figure8.pdf [file Supp_Figure8.pdf]

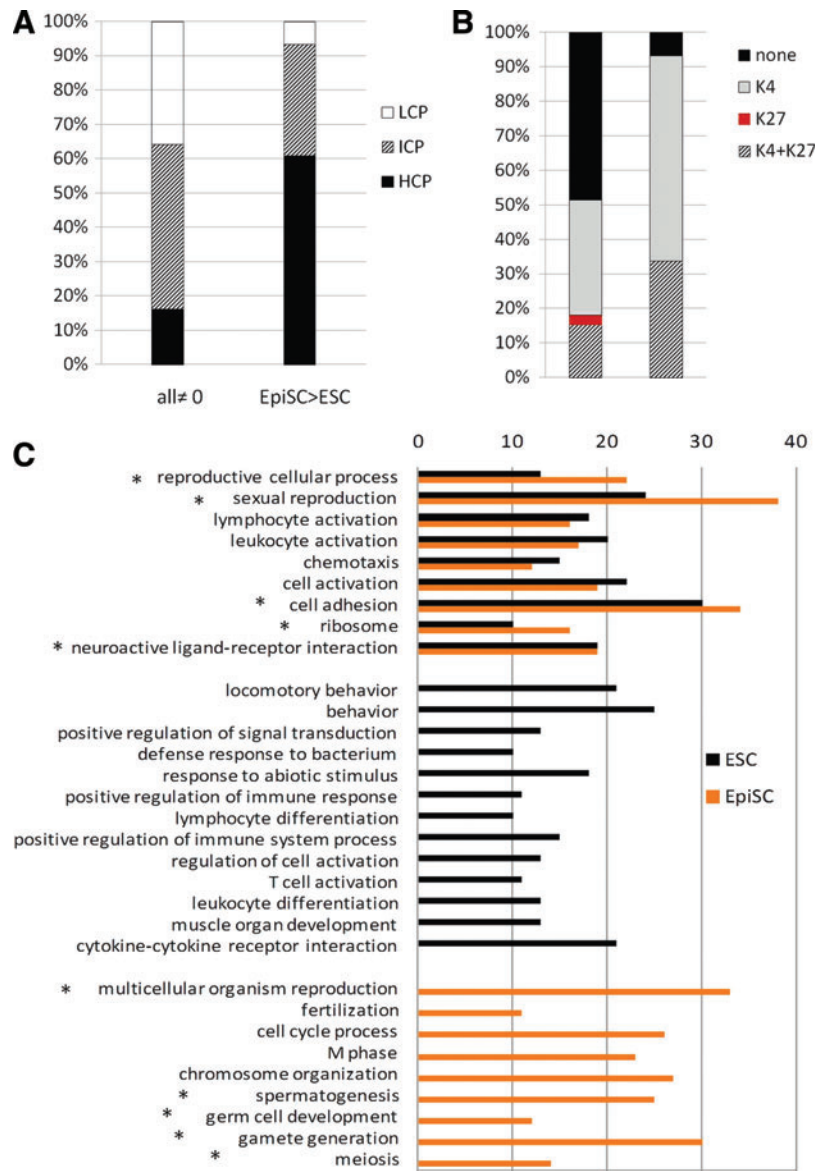

**SUPPLEMENTARY FIG. S8.** Comparison of promoter methylation between ESCs and EpiSCs in MedIPseq data from Senner et al. [21]. One hundred and sixty two promoters were found hypermethylated in EpiSCs compared to 16 in ESCs (read density ratio >3). **(A)** Classification of hypermethylated promoters in EpiSCs. **(B)** Classification of all promoters (read density in EpiSC ≠ 0) and differentially methylated promoters in EpiSC (ratio EpiSC/ESC >3) according to their association with H3K4me3, H3K27me3, bivalent (H3K4me3+H3K27me3,) or neither marks in ESCs. **(C)** GO terms associated with promoters methylated (read density >20) in EpiSCs and in ESCs, according to DAVID analysis (*P*-value ≤ 1%). Identical GO terms with our data are indicated by \*. Overlap is significant, especially for germline-related GO terms.
